# Supplementary material for: The historical decline of tobacco smoking among United States physicians: 1949–1984
Source: PubMed Central journal article supplement (PMC2556033; doi:10.1186/1617-9625-4-9), 2008-09-09
Supplement: 1617-9625-4-9-S1.pdf [file 1617-9625-4-9-S1.pdf]

**Table 1 Results of Tobacco Smoking Surveys Conducted among Physicians in the United States between 1949 and 1984 (Arranged by Geographic Location and Date of Survey)**

| Details of the Study                    |                   |                       | Participants <sup>d</sup> |           | Current Smoker <sup>e</sup> |      |       | History <sup>f</sup> |        | Research Methodology <sup>g</sup> |        |          | Miscellaneous <sup>h</sup>                                                                            |
|-----------------------------------------|-------------------|-----------------------|---------------------------|-----------|-----------------------------|------|-------|----------------------|--------|-----------------------------------|--------|----------|-------------------------------------------------------------------------------------------------------|
| Authors (Publication Year) <sup>a</sup> | Year <sup>b</sup> | Location <sup>c</sup> | Source                    | Specialty | Cigarette                   | Pipe | Cigar | Former               | Never  | Distribution                      | Sample | Response | Additional Findings / Smoking Rate by Specialty                                                       |
| <b>Single States</b>                    |                   |                       |                           |           |                             |      |       |                      |        |                                   |        |          |                                                                                                       |
| Linn et al (1986)[1]                    | 1984              | California            | University / Hospital     | Mixed     | 9%                          | -    | -     | -                    | 91%    | Postal†                           | 211    | 67%      | Of the total group, 4% were daily smokers, 1% weekly smokers and 4% monthly smokers                   |
| Fortmann et al (1985)[2]                | 1982              | California            | Medical Society           | Mixed     | 8%¶                         |      |       | -                    | -      | Postal†                           | 221    | 62%      | Physicians >46 years had the highest smoking rate. By specialty: Primary Care (13%), Specialists (6%) |
| Wells et al (1984)[3]                   | 1978              | California            | Medical Society           | Mixed     | 15%                         | -    | -     | -                    | -      | Postal†                           | 151    | 76%      | Family Medicine (14%), Internal Medicine (14%), Surgery / Obstetrics (17%)                            |
| CMA (1968)[4]                           | 1966              | California            | Not Specified             | Mixed     | 21%                         | -    | -     | 38%                  | 40%    | Postal                            | 2921   | 67%      | Physicians aged 55-59 years had the highest smoking rate of all those surveyed (24%)                  |
| Thomas (1968)[5]                        | 1968*             | Connecticut           | County Physicians         | Mixed     | 17%                         | -    | -     | 55%                  | 19%    | Postal                            | 743    | 73%      | Of the county physicians who had smoked in the past, 18% had tried to quit but failed                 |
| Thomas (1968)[5]                        | 1968*             | Connecticut           | Medical Centre            | Mixed     | 25%                         | -    | -     | 42%                  | 13%    | Postal                            | 134    | n/s      | Of the medical centre physicians who had smoked in the past, 25% had tried to quit but failed         |
| Fulghum et al (1972)[6]                 | 1972              | Florida               | Not Specified             | Mixed     | 18%                         | -    | -     | 45%                  | 37%    | Postal                            | 5736   | 66%      | Obstetrics / Gynaecology (26%), Urology (25%), Psychiatry (22%), General Practice (20%)               |
| Tate & Fulghum (1965)[7]                | 1964              | Florida               | Not Specified             | Mixed     | 30%                         | -    | -     | 45%                  | 25%    | Postal                            | 3467   | 60%      | Urology (40%), Obstetrics / Gynaecology (37%), Psychiatry (37%), General Practice (37%)               |
| Levitt & DeWitt (1970)[8]               | 1969              | Indiana               | Medical Association       | Mixed     | 17%                         | -    | -     | -                    | -      | Postal                            | 2760   | 71%      | Average smoking rate was 22 cigarettes per day, and 38% of smokers had reduced their consumption      |
| Wyshak et al (1980)[9]                  | 1979              | Massachusetts         | State Physicians          | Mixed     | 14%                         | -    | -     | -                    | -      | Postal                            | 289    | 70%      | Fewer physicians smoked when compared to lawyers in the same study                                    |
| Monson (1970)[10]                       | 1968              | Massachusetts         | Medical Society           | Mixed     | 24%(M)                      | -    | -     | -                    | 38%    | Postal                            | 1080   | 77%      | Over 50% of physicians aged 35 years and older were current smokers                                   |
| Snegireff & Lombard (1959)[11]          | 1959              | Massachusetts         | Medical Society           | Mixed     | 39%                         | -    | -     | -                    | -      | Postal                            | 4574   | n/s      | A further 17% of physicians smoked tobacco of some type other than cigarettes                         |
| Snegireff & Lombard (1955)[12]          | 1954              | Massachusetts         | Medical Society           | Mixed     | 52%‡                        | -    | -     | 16-22%               | 13-17% | Postal                            | 4171   | n/s      | Lowest rate: Preventive Medicine / Public Health (46%), Highest rate: Proctology (82%)                |
| Snegireff & Lombard (1954)[13]          | 1954              | Massachusetts         | Medical Society           | Mixed     | 35%                         | 20%  | 20%   | 17%                  | 16%    | Postal                            | 4104   | n/s      | The prevalence of cigarette smoking by gender was 34% for males and 43% for females                   |
| Greenwald et al (1971)[14]              | 1968              | New York              | Woman's Auxiliary         | Mixed     | 24%¶                        |      |       | ~43%‡                | ~31%‡  | Postal†                           | 4260#  | 81%      | Physicians who had never smoked tended to have wives who had also never smoked, and vice versa        |
| Browning & Thorp (1969)[15]             | 1968              | Ohio                  | Thoracic Society          | PUL       | 10%                         | -    | -     | 46%                  | 44%    | Postal                            | 144    | 77%      | Of the current smokers, 53% had never tried to quit and 47% had previously tried to quit but failed   |
| Weitman et al (1967)[16]                | 1964              | Oregon                | Medical Association       | Mixed     | 39%¶                        |      |       | 27%                  | 34%    | Postal†                           | 1790   | 90%      | Only 13% of dermatologists had never smoked compared to 48% of public health physicians               |
| Meighan & Weitman (1965)[17]            | 1964              | Oregon                | Medical Association       | Mixed     | 24%                         | 15%≈ |       | 27%‡                 | 34%‡   | Postal†                           | 1794   | 90%      | Average number of cigarettes smoked per day by current smokers was 21                                 |
| Glanz et al (1982)[18]                  | 1980              | Pennsylvania          | University Staff          | Mixed     | 19%                         | -    | -     | 19%                  | -      | Personal                          | 296    | 47%      | Other health-related behaviours were also studied, with 61% being frequent alcohol consumers          |
| Boucot & Mausner (1964)[19]             | 1964              | Pennsylvania          | Medical Society           | Mixed     | 42%¶                        |      |       | 37%                  | 21%    | Postal                            | 2489   | 70%      | Of the male smokers, 30% smoked cigarettes only, 52% smoked pipes and / or cigars                     |
| Buechner et al (1986)[20]               | 1983              | Rhode Island          | Licensed Physicians       | Mixed     | 8%                          | -    | -     | -                    | 60%    | Postal                            | 1837   | 82%      | Cigarette smoking ranged from 4% in otolaryngology to 14% in obstetrics / gynaecology                 |
| Burgess et al (1980)[21]                | 1978              | Rhode Island          | Active Practitioners      | Mixed     | 13%                         | -    | -     | -                    | -      | Postal                            | 1399   | 84%      | Cigarette smoking rates: 9% (internal medicine) to 19% (otolaryngology or obstetrics / gynaecology)   |
| Burgess et al (1978)[22]                | 1973              | Rhode Island          | Licensed Physicians       | Mixed     | 19%                         | -    | -     | 35%                  | 46%    | Postal                            | 1234   | 89%      | Cigarette smoking ranged from 9% in internal medicine, to 28% in obstetrics / gynaecology             |
| Burgess & Tierney (1970)[23]            | 1968              | Rhode Island          | Licensed Physicians       | Mixed     | 26%                         | -    | -     | -                    | -      | Postal                            | 1026   | 87%      | Major non-response bias in smoking prevalence rates (23%: respondents, 46%: non-respondents)          |
| Burgess & Tierney (1969)[24]            | 1968              | Rhode Island          | Licensed Physicians       | Mixed     | 23%                         | 18%≈ |       | 29%                  | 30%    | Postal                            | 1026   | 87%      | Cigarette smoking rates: 13% (ophthalmology) to 67% ("miscellaneous" physicians)                      |
| Murphy & Tierney (1963)[25]             | 1963              | Rhode Island          | Medical Society           | Mixed     | 33%                         | -    | -     | 36%                  | 31%    | Postal                            | 752    | 70%      | Cigarette smoking ranged from 10% (dermatologists) to 58% ("miscellaneous")                           |

|                                      |         |                        |                       |                |                      |                     |     |                    |                    |              |         |        |                                                                                                            |
|--------------------------------------|---------|------------------------|-----------------------|----------------|----------------------|---------------------|-----|--------------------|--------------------|--------------|---------|--------|------------------------------------------------------------------------------------------------------------|
| Samp (1963)[26]                      | 1963*   | Wisconsin              | Medical Society       | Mixed          | 39%‡                 | -                   | -   | 13%‡               | -                  | Meetings     | 652     | 40%□   | A further 5% of physicians had “cut down considerably” compared to their prior smoking habits              |
| <b>Multiple States</b>               |         |                        |                       |                |                      |                     |     |                    |                    |              |         |        |                                                                                                            |
| Covey & Wynder (1981)[27, 28]        | 1977-79 | AL, CA, IL, NY, PN     | Hospital Patients     | PH/DN          | 11%!!                | 16%≈!!              |     | 70%!!              | 46%!!              | Interview    | 61!!    | n/s    | 7% of physicians and / or dentists smoked over 21 cigarettes per day                                       |
| ACS (1981)[29]                       | 1981*   | CA, DL, GE, PN, RI, WI | ACS Unit Members      | GP, IM, OBG, O | 13%                  | -                   | -   | -                  | -                  | Interview    | 494     | n/s    | Smoking physicians were much less likely to speak forcefully to patients about quitting smoking            |
| Lipp & Benson (1972)[30]             | 1971    | CA, NB, NY             | Medical Association   | Mixed          | 21%                  | -                   | -   | 40%                | -                  | Postal       | 1314    | 47-53% | Physicians in Nebraska (29%) were more likely to smoke cigarettes than in upstate New York (16%)           |
| Vaillant et al (1970)[31, 32]        | 1967    | ML, MS, NY, PN         | University Alumni     | Mixed          | 30%‡                 | 28%≈‡               |     | -                  | -                  | Longitudinal | 45      | n/s    | Pipe or cigar smokers now comprise almost half of all current tobacco smokers                              |
| Vaillant et al (1970)[31, 32]        | 1964    | ML, MS, NY, PN         | University Alumni     | Mixed          | 33%‡                 | 31%≈‡               |     | -                  | -                  | Longitudinal | 45      | n/s    | Around 5% of current cigarette smokers are now consuming 2 or more packs per day                           |
| Vaillant et al (1970)[31, 32]        | 1957    | ML, MS, NY, PN         | University Alumni     | Mixed          | 43%‡                 | 19%≈‡               |     | -                  | -                  | Longitudinal | 45      | n/s    | Similar proportions of current cigarette smokers are consuming 1-10 or 10-20 cigarettes per day            |
| Vaillant et al (1970)[31, 32]        | 1953    | ML, MS, NY, PN         | University Alumni     | Mixed          | 46%‡                 | 13%≈‡               |     | -                  | -                  | Longitudinal | 45      | n/s    | The majority of current cigarette smokers are consuming 10-20 cigarettes per day                           |
| Vaillant et al (1970)[31, 32]        | 1949    | ML, MS, NY, PN         | University Alumni     | Mixed          | 64%‡                 | 7%≈‡                |     | -                  | -                  | Longitudinal | 45      | n/s    | Pipe or cigar smokers comprised only a very small proportion of all current smokers                        |
| <b>National Surveys</b>              |         |                        |                       |                |                      |                     |     |                    |                    |              |         |        |                                                                                                            |
| CA:ACJC (1985)[33]                   | 1984    | Nationwide             | Practicing Physicians | Mixed          | 12%¶                 |                     |     | -                  | -                  | Telephone    | 1035    | 91%    | 97% of physicians were advising patients not to smoke, although only 89% were advising <i>all</i> patients |
| Stellman et al (1988)[34]            | 1982    | Nationwide             | General Population    | Mixed          | 15% (M)<br>21% (F)   | 10% (M)≈<br>0% (F)≈ |     | 43% (M)<br>32% (F) | 32% (M)<br>47% (F) | ACS CPS-II   | 872061° | n/s    | Average number of cigarettes smoked per day by current smokers was 23 (males) and 21 (females)             |
| Brackbill et al (1988)[35]           | 1978-80 | Nationwide             | General Population    | Mixed          | 17%                  | -                   | -   | 58%                | 57%                | NHIS         | 65      | n/s    | 47% of males smoked 20-39 cigarettes per day and 9% smoked 40 or more cigarettes per day                   |
| MMWR (1977)[36]                      | 1975    | Nationwide             | Medical Association   | Mixed          | 21%¶                 |                     |     | 37%                | 42%                | Postal†      | ~5000   | n/s    | 36% smoked 1-14 cigarettes per day, 34% smoked 15-24 per day and 29% smoked over 25 per day                |
| Nelson et al (1994)[37]              | 1974-77 | Nationwide             | General Population    | Mixed          | 19%                  | -                   | -   | 32%                | -                  | NHIS         | 137     | n/s    | There were estimated to be between 32 000 and 71 000 physicians in the US who smoked between 1974-77       |
| Bruce et al (1974)[38]               | 1967-71 | Nationwide             | Society Members       | ANE            | 60% (M)‡<br>48% (F)‡ | -                   | -   | 6%‡                | -                  | Postal       | 6938    | 59%    | 74% of current smokers claimed they smoked 20 or less than cigarettes per day                              |
| Sterling & Weinkam (1976)[39]        | 1970    | Nationwide             | General Population    | PH/SG          | 16% (WM)             | -                   | -   | -                  | -                  | HIS          | 141     | n/s    | 50% of current white male smokers smoked less than one pack of cigarettes per day                          |
| Eisinger (1972)[40]                  | 1968    | Nationwide             | Licensed Physicians   | PED            | 36%                  | -                   | -   | 25%                | -                  | NORCS        | 287     | 38%§   | Of the paediatricians who had tried to quit smoking, only 46% had been successful                          |
| Tamerin & Eisinger (1972)[41]        | 1968    | Nationwide             | Licensed Physicians   | PSY            | 42%¶                 |                     |     | 39%                | -                  | NORCS        | 309     | 38%§   | Of the psychiatrists who had tried to quit smoking, only 39% had been successful                           |
| NCSH (1968)[42]                      | 1968    | Nationwide             | Licensed Physicians   | Mixed          | 29%                  | -                   | -   | 37%                | -                  | NORCS        | 4912    | 38%§   | Of the 82% of physicians who had ever smoked, 68% had been successful in quitting                          |
| Coe & Brehm (1971)[43]               | 1967    | Nationwide             | Practicing Physicians | GP/IM          | 31%‡                 | -                   | -   | 35%‡               | 34%‡               | Interview    | 1591    | n/s    | Internal medicine physicians (31%) were more likely to smoke than general practitioners (29%)              |
| MMWR (1977)[36]                      | 1967    | Nationwide             | Medical Association   | Mixed          | 30%¶                 |                     |     | 36%                | 35%                | Postal†      | n/s     | n/s    | 31% smoked 1-14 cigarettes per day, 30% smoked 15-24 per day and 39% smoked over 25 per day                |
| <b>Journal-Based Surveys</b>         |         |                        |                       |                |                      |                     |     |                    |                    |              |         |        |                                                                                                            |
| Patient Care (1976)[44]              | 1976*   | Nationwide             | Journal Subscribers   | Mixed          | 27%¶                 |                     |     | -                  | -                  | Journal      | 562     | 56%    | 62% of all current smokers smoked cigarettes and 37% smoked pipes or cigars                                |
| Modern Medicine (1966)[45]           | 1966    | Nationwide             | Journal Subscribers   | Mixed          | 23%                  | -                   | -   | 15%‡               | 45%                | Journal      | 2178    | n/s    | Over half (55%) reported smoking tobacco products of some description within the past five years           |
| Medical Tribune (1965)[46]           | 1965*   | Nationwide             | Journal Subscribers   | Mixed          | -                    | 10%                 | 11% | 38%                | 27%                | Journal      | 1440∅   | n/s    | The percentage of ex-smokers rose with age, from 34% (<40 years old), to 42% (>65 years old)               |
| Modern Medicine (1964)[47]           | 1964    | Nationwide             | Journal Subscribers   | Mixed          | 23%                  | 19%                 | 15% | -                  | 20%                | Journal      | 56004   | n/s    | The highest proportion of non-smokers (57%) was among physicians aged over 60 years                        |
| Medical Times (1957)[48]             | 1952-57 | Nationwide             | Journal Subscribers   | GP             | -                    | -                   | -   | -                  | -                  | Journal      | 594     | 28%    | Of the GPs who smoked in 1952, by 1957 17% had quit and 14% had reduced their consumption                  |
| Medical Times (1957)[48]             | 1952-57 | Nationwide             | Journal Subscribers   | RES            | -                    | -                   | -   | -                  | -                  | Journal      | 675     | 27%    | Of the residents who smoked in 1952, by 1957 20% had quit and 19% had reduced their consumption            |
| <b>Other / Unspecified Locations</b> |         |                        |                       |                |                      |                     |     |                    |                    |              |         |        |                                                                                                            |
| Marwick (1984)[49]                   | 1984    | Not Specified          | Conference Delegates  | CAR            | 7%                   | -                   | -   | -                  | -                  | Conference   | ~500    | n/s    | Although reported by Marwick,[49] the study was actually conducted by Jeremiah Stamler                     |

|                               |      |               |                      |       |         |       |     |     |            |            |     |                                                                                             |                                                                                                   |
|-------------------------------|------|---------------|----------------------|-------|---------|-------|-----|-----|------------|------------|-----|---------------------------------------------------------------------------------------------|---------------------------------------------------------------------------------------------------|
| Sachs (1983,1984)[50, 51]     | 1983 | Not Specified | Conference Delegates | PUL   | 5-19%   | 0-7%≈ | -   | -   | Conference | 594        | 27% | Smoking was higher among non-practicing specialists (19%) than practicing specialists (12%) |                                                                                                   |
| Westling-Wikstrand (1970)[52] | 1968 | Not Specified | University Alumni    | Mixed | 36% (F) | -     | -   | 14% | 42%        | Postal     | 81  | n/s                                                                                         | Rate: Professors (59%), Not board-certified (37%), Board certified (14%), Not in practice (25%)   |
| McIlreath & Cohen (1966)[53]  | 1964 | Not Specified | Conference Delegates | Mixed | 16%‡    | 5%‡   | 4%‡ | -   | -          | Conference | 262 | n/s                                                                                         | A significantly greater number of cigarette smokers displayed abnormal lung-function test results |

### Table 1 Legend

<sup>a</sup>Author of study, year of publication and reference number used in this manuscript (ACS=American Cancer Society, CA:ACJC=AC: A Cancer Journal for Clinicians, CMA=California Medical Association, MMWR=Morbidity and Mortality Weekly Report, NCSH=National Clearinghouse for Smoking and Health), <sup>b</sup>Year in which the study was conducted (in cases where the study year was not listed, the publication year is listed and marked with an asterisk\*), <sup>c</sup>State in which the study was undertaken (AL=Alabama, CA=California, DL=Delaware, IL=Illinois, MS=Massachusetts, ML=Maryland, NB=Nebraska, NY=New York, PN=Pennsylvania, RI=Rhode Island, WI=Wisconsin), <sup>d</sup>From where the participants were sourced (using terms as described in the manuscript) and whether their medical specialty was listed (CAR=Cardiologists, GP=General Practitioners, IM=Internal Medicine, O=Other or undefined speciality, OBG=Obstetrics / Gynaecology, PED=Paediatricians, PH/DN=Physicians/Dentists, PH/SG=Physicians/Surgeons, PUL=Pulmonary Physicians, PSY=Psychiatrists, RES=Medical Residents), <sup>e</sup>Smoking status as defined in the manuscript and categorized (when available) with all smoking rates rounded to the nearest whole number (M=Male, F=Female, WM=White Male), <sup>f</sup> Prior history of smoking, <sup>g</sup>The type of tobacco smoked was not defined, <sup>h</sup>≈Current smoker of pipes or cigars or both, <sup>i</sup>‡Rates calculated by the author, <sup>j</sup>!!The smoking rates of physicians and dentists were combined, <sup>k</sup>Methodology used in the study with response rates rounded to the nearest whole number, <sup>l</sup>†Other methods were used to follow-up initial non-responders (mainly telephone calls), <sup>m</sup>#Response rate of the physician's wives (physicians' smoking habits were reported by their wives), <sup>n</sup>Response rate calculated by the author, <sup>o</sup>Total participants in the study (not only physicians), <sup>p</sup>∅Response rate stated as "nearly", <sup>q</sup>§For physician data extracted from national surveys, the overall response rate of the entire survey is listed (ACS=American Cancer Society, HIS=Health Interview Survey, NHIS=National Health Interview Survey, NORCS=National Opinion Research Center Survey), n/s=the response rate of the survey was not specified, <sup>r</sup>Additional information from the study (including smoking rates by medical speciality, where available)

### Table 1 References

1. Linn LS, Yager J, Cope D, Leake B: **Health habits and coping behaviors among practicing physicians.** *The Western journal of medicine* 1986, **144**(4):484-489.
2. Fortmann SP, Sallis JF, Magnus PM, Farquhar JW: **Attitudes and practices of physicians regarding hypertension and smoking: The Stanford Five City Project.** *Preventive medicine* 1985, **14**(1):70-80.
3. Wells KB, Lewis CE, Leake B, Ware JE, Jr.: **Do physicians preach what they practice? A study of physicians' health habits and counseling practices.** *JAMA* 1984, **252**(20):2846-2848.
4. **The smoking study. A report of the attitudes and habits of California physicians with respect to cigarette smoking.** *California medicine* 1968, **109**(4):339-344.
5. Thomas N: **Smoking attitudes of New Haven county physicians: a survey.** *Connecticut medicine* 1968, **32**(12):902-905.
6. Fulghum JE, Groover ME, Jr., Williams AC, Braatz W: **Smoking habits of Florida physicians revisited.** *JFMA, the Journal of the Florida Medical Association* 1972, **59**(10):23-28.
7. Tate CI, Fulghum JE: **Seventy Per Cent of Florida Physicians Are Nonsmokers.** *The Journal of the Florida Medical Association* 1965, **52**:47-48.
8. Levitt EE, DeWitt KN: **A survey of smoking behavior and attitudes of Indiana physicians.** *The Journal of the Indiana State Medical Association* 1970, **63**(4):336-339.
9. Wyshak G, Lamb GA, Lawrence RS, Curran WJ: **A profile of the health-promoting behaviors of physicians and lawyers.** *The New England journal of medicine* 1980, **303**(2):104-107.
10. Monson RR: **Cigarette smoking by Massachusetts physicians--1968.** *The New England journal of medicine* 1970, **282**(16):906-908.
11. Snegireff LS, Lombard OM: **Smoking habits of Massachusetts physicians; five-year follow-up study (1954-1959).** *The New England journal of medicine* 1959, **261**:603-604.
12. Snegireff LS, Lombard OM: **Comparative study of smoking habits of physicians.** *The New England journal of medicine* 1955, **252**(17):691-696.
13. Snegireff LS, Lombard OM: **Survey of smoking habits of Massachusetts physicians.** *The New England journal of medicine* 1954, **250**(24):1042-1045.
14. Greenwald P, Nelson D, Greene D: **Smoking habits of physicians and their wives.** *New York state journal of medicine* 1971, **71**(17):2096-2098.

15. Browning RH, Thorp D: **Cigarettes. The Ohio Thoracic Society reports.** *The Ohio State medical journal* 1969, **65**(3):245-247.
16. Weitman M, Meighan SS: **Smoking patterns and specialty training of Oregon physicians.** *Cancer* 1967, **20**(6):974-982.
17. Meighan SS, Weitman M: **Smoking: habits and beliefs of Oregon physicians.** *Journal of the National Cancer Institute* 1965, **35**(5):893-898.
18. Glanz K, Fiel SB, Walker LR, Levy MR: **Preventive health behavior of physicians.** *Journal of medical education* 1982, **57**(8):637-639.
19. Boucot KR, Mausner JS: **Smoking among the members of the Philadelphia County Medical Society.** *Philadelphia Medicine* 1964, **59**:711-712.
20. Buechner JS, Perry DK, Scott HD, Freedman BE, Tierney JT, Waters WJ: **Cigarette smoking behavior among Rhode Island physicians, 1963-83.** *American journal of public health* 1986, **76**(3):285-286.
21. Burgess AM, Jr., Casey DV, Tierney JT, DePalo P: **Cigarette smoking by Rhode Island physicians: a fifteen year update. Percentage of physicians who smoke continues to decrease.** *Rhode Island medical journal* 1980, **63**(9):345-347.
22. Burgess AM, Jr., Casey DB, Tierney JT: **Cigarette smoking by Rhode Island physicians, 1963-1973: comparison with lawyers and other adult males.** *American journal of public health* 1978, **68**(1):63-65.
23. Burgess AM, Jr., Tierney JT: **Bias due to nonresponse in a mail survey of Rhode Island physicians' smoking habits--1968.** *The New England journal of medicine* 1970, **282**(16):908.
24. Burgess AM, Jr., Tierney JT: **Rhode Island physicians' smoking habits revisited 1963-1968.** *Rhode Island medical journal* 1969, **52**(8):437-440.
25. Murphy TH, Tierney JT: **Current Status of Cigarette Smoking among Rhode Island Physicians.** *Rhode Island medical journal* 1963, **46**:655-657.
26. Samp RJ: **Wisconsin physicians and cigarette smoking.** *Wisconsin medical journal* 1963, **62**:229.
27. Covey LS, Wynder EL: **Smoking habits and occupational status.** *J Occup Med* 1981, **23**(8):537-542.
28. Wynder EL, Stellman SD: **Comparative epidemiology of tobacco-related cancers.** *Cancer research* 1977, **37**(12):4608-4622.
29. **The impact of providing physicians with quit-smoking materials for smoking patients.** *CA: a cancer journal for clinicians* 1981, **31**(2):75-78.
30. Lipp MR, Benson SG: **Physician use of marijuana, alcohol, and tobacco.** *The American journal of psychiatry* 1972, **129**(5):612-616.
31. Enstrom JE, Kanim LE: **Smoking cessation among California physicians: an example of cancer control.** *Progress in clinical and biological research* 1984, **156**:255-264.
32. Vaillant GE, Brighton JR, McArthur C: **Physicians' use of mood-altering drugs. A 20-year follow-up report.** *The New England journal of medicine* 1970, **282**(7):365-370.
33. **Survey of physicians' attitudes and practices in early cancer detection.** *CA: a cancer journal for clinicians* 1985, **35**(4):197-213.
34. Stellman SD, Boffetta P, Garfinkel L: **Smoking habits of 800,000 American men and women in relation to their occupations.** *American journal of industrial medicine* 1988, **13**(1):43-58.
35. Brackbill R, Frazier T, Shilling S: **Smoking characteristics of US workers, 1978-1980.** *American journal of industrial medicine* 1988, **13**(1):5-41.
36. **Current trends: Smoking behavior and attitudes of physicians, dentists, nurses, and pharmacists, 1975.** *Mmwr* 1977, **26**:185.
37. Nelson DE, Giovino GA, Emont SL, Brackbill R, Cameron LL, Peddicord J, Mowery PD: **Trends in cigarette smoking among US physicians and nurses.** *JAMA* 1994, **271**(16):1273-1275.
38. Bruce DL, Eide KA, Smith NJ, Seltzer F, Dykes MH: **Characteristics of the American Society of Anesthesiologists' membership, 1967-1971.** *Anesthesiology* 1974, **41**(1):67-70.
39. Sterling TD, Weinkam JJ: **Smoking characteristics by type of employment.** *J Occup Med* 1976, **18**(11):743-754.

40. Eisinger RA: **Cigarette smoking and the pediatrician. Findings based on a national survey.** *Clinical pediatrics* 1972, **11**(11):645-647.
41. Tamerin JS, Eisinger RA: **Cigarette smoking and the psychiatrist.** *The American journal of psychiatry* 1972, **128**(10):1224-1229.
42. **National Clearinghouse for Smoking and Health: Survey conducted by the National Opinion Research Center.** Washington: US Public Health Service; 1968.
43. Coe RM, Brehm HP: **Smoking habits of physicians and preventive care practices.** *HSMHA health reports* 1971, **86**(3):217-221.
44. **Special survey - How doctors take care of themselves.** *Patient Care* 1976, **10**(8):49-59.
45. **1966 survey results: Fewer doctors now smoke; patients often ignore advice.** *Mod Med* 1966, **34**(6):14,18.
46. **Doctor, When did you have your last cigarette?** *Med Tribune* 1965, **6**:21.
47. **60,000 answer MM smoking survey: Half of physicians don't smoke; nearly quarter use cigarettes.** *Mod Med* 1964, **32**(5):18,22,26,30.
48. **Doctors have changed their smoking habits.** *Medical times* 1957, **85**(11):1211-1223.
49. Marwick C: **Many physicians following own advice about not smoking.** *JAMA* 1984, **252**(20):2804.
50. Sachs DP: **Smoking habits of pulmonary physicians.** *The New England journal of medicine* 1983, **309**(13):799.
51. Sachs DP: **Treatment of cigarette dependency. What American pulmonary physicians do.** *The American review of respiratory disease* 1984, **129**(6):1010-1013.
52. Westling-Wikstrand H, Monk MA, Thomas CB: **Some characteristics related to the career status of women physicians.** *Johns Hopkins Medical Journal* 1970, **127**(5):273-286.
53. McIlreath FJ, Cohen BM: **Ventilatory performance of American physicians.** *The American journal of the medical sciences* 1966, **252**(1):1-8.
